# Supplementary material
Source: Springer Nature journal article supplement (https://www.springermedizin.de/resource/supplementary/12888_2013_1522_MOESM1_ESM.pdf/9481308)
Supplement: MOESM1 [file 9481308]

## Additional File 1: Example of a feedback report

### K&J - jeugdigen SDQ en KIDSCREEN-52 (huidige scores op de SDQ)

| SDQ-schaal                      | score | norm        |
|---------------------------------|-------|-------------|
| Emotionele problemen            | 2     | normaal     |
| Gedragsproblemen                | 5     | klinisch    |
| Hyperactiviteit/aandachtstekort | 5     | normaal     |
| Problemen met leeftijdgenoten   | 5     | klinisch    |
| Prosociaal gedrag               | 5     | subklinisch |
| Totaal                          | 17    | klinisch    |
| Impactscore                     | 0     | normaal     |

### K&J - jeugdigen SDQ en KIDSCREEN-52 (scoreverloop metingen SDQ)

| SDQ-schaal                      | score Meting: 1 | score Meting: 2 | Vergelijking Meting: 2 - Meting: 1 |
|---------------------------------|-----------------|-----------------|------------------------------------|
| Emotionele problemen            | 2               | 2               | 0                                  |
| Gedragsproblemen                | 10              | 5               | -5                                 |
| Hyperactiviteit/aandachtstekort | 10              | 5               | -5                                 |
| Problemen met leeftijdgenoten   | 8               | 5               | -3                                 |
| Prosociaal gedrag               | 0               | 5               | 5                                  |
| Impactscore                     | 9               | 0               | -9                                 |
| Totaal                          | 30              | 17              | -13                                |

### K&J - jeugdigen SDQ en KIDSCREEN-52 (SDQ: subschaal problemen met leeftijdgenoten)

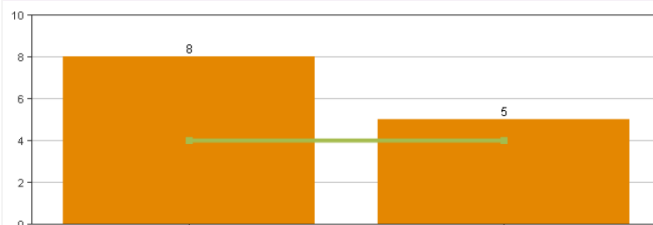

### K&J - jeugdigen SDQ en KIDSCREEN-52 (huidige scores op de KIDSCREEN)

| KIDSCREEN-schaal                    | score | norm             |
|-------------------------------------|-------|------------------|
| Fysiek welzijn                      | 15    | lage score       |
| Psychologisch welzijn               | 18    | lage score       |
| Stemming en emoties                 | 28    | gemiddelde score |
| Zelf-perceptie                      | 16    | lage score       |
| Autonomie                           | 20    | gemiddelde score |
| Relatie met ouders en thuissituatie | 24    | gemiddelde score |
| Sociale steun en leeftijdgenoten    | 24    | gemiddelde score |
| Schoolomgeving                      | 24    | gemiddelde score |
| Sociale acceptatie (pesten)         | 12    | gemiddelde score |
| Financiële bronnen                  | 15    | hoge score       |

### K&J - jeugdigen SDQ en KIDSCREEN-52 (KIDSCREEN: subschaal psychologisch welzijn)

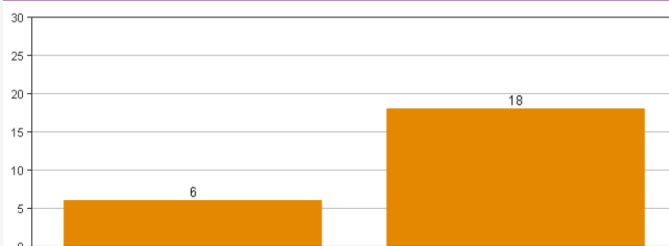

### K&J - jeugdigen SDQ en KIDSCREEN-52 (kritieke items KIDSCREEN)

| Item          | Naam                                    | Vraag                                                | Antwoord      |
|---------------|-----------------------------------------|------------------------------------------------------|---------------|
| KIDSCREEN-1.1 | Lichamelijke activiteiten en gezondheid | Hoe is je gezondheid in het algemeen?                | Slecht        |
| KIDSCREEN-2.1 | Gevoelens                               | Is je leven plezierig geweest?                       | helemaal niet |
| KIDSCREEN-3.1 | Humeur                                  | Heb je het gevoel gehad dat je alles verkeerd doet?  | altijd        |
| KIDSCREEN-6.1 | Familie en thuis                        | Heb je het gevoel gehad dat je ouders je begrijpen?  | helemaal niet |
| KIDSCREEN-6.2 | Familie en thuis                        | Heb je het gevoel gehad dat je ouders van je houden? | helemaal niet |
| KIDSCREEN-6.3 | Familie en thuis                        | Heb je je thuis gelukkig gevoeld?                    | nooit         |
| KIDSCREEN-8.1 | School en leren                         | Heb je het naar je zin gehad op school?              | helemaal niet |
